# 1 **metaMIC: reference-free Misassembly Identification and Correction**

## 2 **of *de novo* metagenomic assemblies**

3 Senying Lai<sup>1</sup>, Shaojun Pan<sup>1</sup>, Luis Pedro Coelho<sup>1,4,§</sup>, Wei-Hua Chen<sup>2,3,§</sup>, Xing-Ming Zhao<sup>1,4,5,§</sup>

### 4 **Affiliations**

5 <sup>1</sup>Institute of Science and Technology for Brain-Inspired Intelligence, Fudan University, Shanghai 200433,  
6 China.

7 <sup>2</sup>Key Laboratory of Molecular Biophysics of the Ministry of Education, Hubei Key Laboratory of  
8 Bioinformatics and Molecular-imaging, Center for Artificial Intelligence Biology, Department of  
9 Bioinformatics and Systems Biology, College of Life Science and Technology, Huazhong University of  
10 Science and Technology, Wuhan, Hubei 430074, China.

11 <sup>3</sup>College of Life Science, Henan Normal University, Xinxiang, Henan 453007, China.

12 <sup>4</sup>MOE Key Laboratory of Computational Neuroscience and Brain-Inspired Intelligence, and MOE  
13 Frontiers Center for Brain Science, Shanghai 200433, China.

14 <sup>5</sup>Research Institute of Intelligent Complex Systems, Fudan University, Shanghai 200433, China.

15

16 <sup>§</sup>To whom correspondence should be addressed.

17

### 18 **Emails**

19 Senying Lai: [19110850024@fudan.edu.cn](mailto:19110850024@fudan.edu.cn)

20 Shaojun Pan: [19110850020@fudan.edu.cn](mailto:19110850020@fudan.edu.cn)

21 Luis Pedro Coelho: [luis@luispedro.org](mailto:luis@luispedro.org)

22 Wei-Hua Chen: [weihuachen@hust.edu.cn](mailto:weihuachen@hust.edu.cn)

23 Xing-Ming Zhao: [xmzhao@fudan.edu.cn](mailto:xmzhao@fudan.edu.cn)

24

25

26

27

## 28 **Abstract**

29 Evaluating the quality of metagenomic assemblies is important for constructing reliable metagenome-  
30 assembled genomes and downstream analyses. Here, we present metaMIC ([https://github.com/ZhaoXM-](https://github.com/ZhaoXM-Lab/metaMIC)  
31 [Lab/metaMIC](https://github.com/ZhaoXM-Lab/metaMIC)), a machine-learning based tool for identifying and correcting misassemblies in  
32 metagenomic assemblies. Benchmarking results on both simulated and real datasets demonstrate that  
33 metaMIC outperforms existing tools when identifying misassembled contigs. Furthermore, metaMIC is  
34 able to localize the misassembly breakpoints, and the correction of misassemblies by splitting at  
35 misassembly breakpoints can improve downstream scaffolding and binning results.

## 36 **Keywords**

37 Metagenomic assemblies, Misassembled contigs, Misassembly breakpoints, Metagenome-assembled  
38 genomes, Binning

## 40 **Background**

41 Constructing reliable metagenome-assembled genomes (MAGs) is of great importance for understanding  
42 microbial communities and downstream functional analysis, such as taxonomic annotations and  
43 reconstruction of metabolic processes [1-4]. MAGs are obtained by binning assembled contigs into bins,  
44 the quality of which can be significantly affected by the assembly errors in contigs. For example, the  
45 chimerical assemblies consisting of two or more genomes can introduce contamination for reconstructed  
46 MAGs, potentially resulting in misleading biological conclusions [5]. Despite the progress in assembly  
47 algorithms, errors are still prevalent in metagenomic-assembled contigs owing to the inherent complexity  
48 of metagenomic data. Assembly errors including inter- and intra-species misassemblies are caused by

49 repetitive genomic regions that occur within the same genome or conserved sequences shared among  
50 distinct organisms, which is especially likely to happen when multiple closely-related strains are present  
51 in the same environment [6, 7]. Therefore, the evaluation of metagenomic assemblies is critical for  
52 constructing high-quality and reliable MAGs.

53       Approaches that have been proposed for assessing the quality of metagenomic assemblies can be  
54 grouped into two categories: *reference-based* and *reference-free* approaches. Reference-based methods  
55 evaluate the *de novo* assemblies by aligning them against corresponding reference genomes. For example,  
56 MetaQUAST [8], the metagenomic-adapted version of QUAST [9], detects misassemblies such as  
57 translocation, inversion and relocation by mapping the metagenomic contigs to a set of closely-related  
58 reference genomes. However, it is difficult to distinguish errors from real structural variation. Moreover,  
59 reference genomes are available for only a small fraction of organisms found in real environments, which  
60 limits these approaches to previously-sequenced species [10]. Therefore, the evaluation of metagenomic  
61 assemblies would benefit from reference-free methods. Typically these methods exploit features such as  
62 the high variation in coverage depth or inconsistent insert distance of paired-end reads to indicate possible  
63 repeat collapse, misjoins or error insertions/deletions [11]. Popular reference-free methods include ALE  
64 [12], DeepMAsED [13], SuRankCo [14] and VALET [15]. ALE measures the quality of assemblies as  
65 the likelihood that the observed reads are generated from a given assembly by modeling the sequencing  
66 process. SuRankCo uses a machine learning approach to provide quality scores for contigs based on  
67 characteristics of contigs such as length and coverage. VALET detects misassemblies based on the  
68 combination of multiple metrics extracted from the alignment of reads to contigs. DeepMAsED employs  
69 a deep learning approach to identify misassembled contigs. Despite the great value of those approaches

70 for evaluating metagenomic assembly quality, only VALET and ALE predict the position where the  
71 misassembly errors are introduced and none of these methods have functionality for correcting  
72 metagenomic misassemblies. More importantly, VALET and SuRankCo are no longer maintained, and  
73 software incompatibilities hinder their use.

74 Here, we present a novel tool called metaMIC which performs reference-free misassembly  
75 identification and correction in *de novo* metagenomic assemblies. metaMIC can identify misassembled  
76 contigs, localize misassembly breakpoints within misassembled contigs and then correct misassemblies  
77 by splitting misassembled contigs at breakpoints. Benchmarking results on both simulated and real  
78 metagenomics data show that metaMIC can identify misassembled contigs with higher accuracy than  
79 state-of-the-art tools, and precisely localize the misassembly error regions and recognize breakpoints in  
80 both single genomic and metagenomic assemblies. By comparing the scaffolding and binning results  
81 before and after metaMIC correction, we demonstrate that the correction of misassemblies by metaMIC  
82 can improve the scaffolding and binning results.

83

## 84 **Results**

### 85 **Overview of the metaMIC pipeline**

86 metaMIC is a fully automated tool for identifying and correcting misassemblies in metagenomic contigs  
87 using the following three steps (Fig. 1). First, various types of features were extracted from the alignment  
88 between paired-end sequencing reads and each contig, including sequencing coverage, nucleotide  
89 variants, mate pair consistency, and *k*-mer abundance differences (KAD) [16] between mapped reads and  
90 the contig. The KAD method was previously developed for evaluating the accuracy of nucleotide base

91 quality in single genomic assemblies. Here, we extended KAD to metagenomic assemblies to measure  
92 the overall consistency between mapped reads and corresponding contigs (see Methods). Secondly, the  
93 features extracted in the first step are used as input to a random forest classifier for identifying  
94 misassembled contigs, where the classifier is trained with simulated bacterial metagenomic communities  
95 to discriminate misassembled contigs from correctly assembled ones. Thirdly, metaMIC will localize  
96 misassembly breakpoint(s) in each misassembled contig, namely the point at which the left and right  
97 flanking sequences are predicted to have originated from different genomes or locations. As most  
98 misassemblies are chimeras where two fragments from different locations or with different orientations  
99 are mistakenly connected and not just random sequences being generated [9], misassemblies can be  
100 corrected by breaking up the contigs into two (or more) correctly assembled contigs.

101

## 102 **Identifying misassembled contigs in simulated metagenomic datasets**

103 To evaluate metaMIC, we tested it on simulated metagenomic datasets obtained from CAMI (the Critical  
104 Assessment of Metagenome Interpretation) [2] that comprise a known mixture of organisms. We first  
105 evaluated metaMIC on the Medium (*CAMI1-Medium*) and High-diversity communities (*CAMI1-High*)  
106 to see how dataset complexity will influence the accuracy of metaMIC. We noticed that the types of  
107 misassemblies identified in these two datasets were slightly different, and the CAMI1-High dataset  
108 contains more inter-species translocations and higher proportion of misassemblies while the CAMI1-  
109 Medium dataset contains more relocations (see Figs. S1, S2), which is consistent with previous  
110 conclusion that datasets with higher intra-species diversity tend to have more inter-species translocation  
111 misassemblies [13]. Compared with CAMI1-High metaMIC performed better on (Fig. 2a; although still

112 significantly better than existing tools) CAMI1-Medium, implying that the higher microbial diversity  
113 increases the challenge of identifying misassembled contigs. We further compared metaMIC on these  
114 datasets against ALE [12] and DeepMAS-ED [13] (See Methods). As shown in Fig. 2a, metaMIC  
115 significantly outperforms both ALE and DeepMAS-ED on the two datasets, as metaMIC achieved 4-fold  
116 higher AUPRC (area under the precision-recall curve).

117 We also evaluated metaMIC and other tools on simulated metagenomic datasets from three different  
118 human body sites: gastrointestinal tract (*CAMI2-Gut*), skin (*CAMI2-Skin*) and oral cavity (*CAMI2-Oral*).  
119 As shown in Figs. 2b, c and Fig. S3, metaMIC has the highest precision when identifying misassembled  
120 contigs at any recall threshold. Additionally, we tested metaMIC on a simulated virome datasets (*Sim-*  
121 *Virome*), which were simulated based on 1,000 complete viral genomes randomly selected from NCBI  
122 RefSeq collection [17] (See Methods). The Sim-Virome contains mainly translocations and relocations  
123 but few inter-species translocations and inversions. We found that metaMIC still significantly  
124 outperforms both ALE and DeepMAS-ED on Sim-Virome dataset as shown in Fig. 2d, indicating that  
125 metaMIC can also be used for virome assemblies besides bacterial metagenomic assemblies.

126 As metaMIC can be trained on contigs assembled by different assemblers, we further investigated  
127 the impact of different assemblers on the performance of metaMIC when identifying misassembled  
128 contigs. Here, two popular assemblers, i.e. MEGAHIT and IDBA\_UD, used for metagenomic data were  
129 considered. As shown in Fig. 2e, we found that metaMIC performed best when it was trained on the same  
130 assembler as it was later evaluated. Therefore, we recommend to use metaMIC trained on the contigs  
131 generated by the same assembler. For version 1.0, metaMIC provides builtin models supporting

132 MEGAHIT and IDBA\_UD as well as the ability to generate new models based on the assembler specified  
133 by users.

134

### 135 **metaMIC can identify breakpoints with higher accuracy in misassembled contigs**

136 Beyond identifying misassembled contigs, metaMIC is able to accurately recognize the misassembly  
137 breakpoints, at which the misassembled contigs can be split into shorter ones. From the distribution, we  
138 can clearly see that the error regions containing any misassembly type generally have significantly higher  
139 anomaly scores than error-free regions, and the inter-species translocation error is most prevalent in the  
140 dataset. In the CAMI datasets, it is indeed the inter-species translocation error that occurs most often  
141 (Fig. S2). The differential distribution of anomaly scores between error and error-free regions implies  
142 that the anomaly score has the potential to recognize the error regions. We also noticed that the  
143 misassembly sites are usually read breakpoints (locations at which the boundaries of aligned read  
144 fragments do not coincide with the ends of corresponding reads) [18]. Similar to anomaly scores, we  
145 found that the read breakpoint ratio was significantly different between error regions and error-free  
146 regions (Fig. 3b, see also Figs. S7, S8).

147       Due to the potential of read breakpoint ratio and anomaly score to localize the error regions, we  
148 want to see whether metaMIC can use these two features to separate the erroneous regions from error-  
149 free regions. From the receiver operation curves shown in Fig. 3c, we can see that with either anomaly  
150 score or read breakpoint ratio, metaMIC can classify the error regions containing misassembly  
151 breakpoints with error-free regions more accurately than ALE. To combine the usages of these two

152 features, metaMIC first localizes the error regions in a misassembled contigs with the help of anomaly  
153 score, and then identifies the exact breakpoints in an error region based on the read breakpoint ratio.

154 We evaluated the performance of both metaMIC and ALE on the five datasets from CAMI as shown  
155 in Fig. 3d. We observed that approximately 71-86% of the metaMIC-predicted breakpoints were within  
156 500bp compared to 26-48% of those by ALE. More importantly, metaMIC could predict the exact  
157 locations for ~25% of the breakpoints with the use of read breakpoints. Again, inter-species  
158 translocations or inversions can be detected with higher accuracy relative to other misassembly types  
159 (Fig. 3e), consistent with previous results that they were supported by more fragmentally aligned reads  
160 and had higher anomaly scores as compared with other error types (see Figs. 3a, b; Fig. S8). Given the  
161 possible influence of contig length on the prediction error size, we normalized the error size by the contig  
162 length, and compared the results of metaMIC with those of ALE. As shown in Fig. 3f, metaMIC still  
163 significantly outperforms ALE with respect to the normalized error size (Wilcoxon test, p-value <2.22e-  
164 16), where the median and mean of the metaMIC's normalized error size were 0.01 and 0.11, respectively,  
165 compared to 0.39 and 0.34 for ALE (see also Fig. S9).

166

### 167 **Splitting misassembled contigs improves downstream binning performance**

168 As metaMIC can identify breakpoints in misassembled contigs, it can split misassembled contigs at  
169 breakpoints and reduce the number of misassemblies (see Methods); although the contiguity could be  
170 slightly decreased due to more fragmented contigs [19]. To see how the correction of splitting  
171 misassembled contigs at breakpoints employed by metaMIC will influence downstream analyses, we  
172 binned the contigs in the simulated datasets. We then assessed the binning performance over the original



173 and metaMIC-corrected contigs by counting the number of obtained high-quality bins. We can see in Fig.  
174 4a that metaMIC correction increases the number of near-complete reconstructed bins (completeness  
175 above 90%, contamination below 5% [3]) by 10-20% (see also Fig. S13a, Table S1), showing that the  
176 correction of metagenomic misassemblies has significant impact on downstream binning. We noticed that  
177 most of the misassemblies corrected by metaMIC were inter-species translocations that were also the  
178 main sources of chimeras and assembly errors in CAMI datasets (Fig. S2, Table S2). From Fig. 4b and  
179 also those shown in Fig. S13b, we can see that bin-wise F1 scores of those bins constructed from  
180 corrected contigs are significantly improved compared with the results over original contigs, indicating  
181 that the reconstructed bins can better represent the reference genomes after metaMIC correction. The  
182 above results clearly demonstrate that the correction of metagenomic misassemblies by metaMIC can  
183 significantly improve the resulting bins in term of both completeness and contaminations, which is  
184 important for understanding the complex microbiota communities.

185

## 186 **Application of metaMIC to real metagenomic datasets**

187 To better evaluate the performance of metaMIC, we applied metaMIC to two recent human gut  
188 metagenomics datasets from Ethiopian [20] and Madagascar [21] cohorts that consist of 50 and 112  
189 samples, respectively. In total, metaMIC respectively identified 5,905 and 18,436 misassembled contigs  
190 in *Ethiopian* and *Madagascar* datasets, which represents 2.59% and 4.53% of all contigs in the two  
191 datasets. We then separately binned the original and corrected contigs into bins. Strikingly, we found  
192 that ~20% of the resulting original-bins contained misassemblies, although the latter accounted for less  
193 than 5% of all contigs (See Table S3). As previous results have demonstrated that metaMIC correction

194 can improve the binning results in simulated datasets, we further explored whether the correction step  
195 employed by metaMIC can improve downstream results in real datasets. As shown in Fig. 5, in addition  
196 to obtaining more bins of high quality (Completeness >90 and Contamination <5) (Fig. 5a, Table S3),  
197 the corrected bins had an equal or higher F1 score compared to the corresponding original bins (Fig. 5b).  
198 The results indicate that the misassembled contigs identified by metaMIC in these two real datasets are  
199 really misassembled, the correction of which can significantly improve downstream analysis results.

200 As these contamination metrics are based on *in silico* evaluation, we further tested the ability of  
201 identifying misassemblies using another metagenomic dataset (a combined rumen fluid and solid sample)  
202 where both short and long reads are available. Since the long reads from PacBio platforms are able to  
203 span repeats [22, 23], which are the main contributor to misassemblies, we can therefore use the long-  
204 read assemblies as gold standards to validate our predicted misassembled contigs from the short-read  
205 assemblies. In total, metaMIC identified 692 misassembled contigs (approximately 2.5%) in the short-  
206 read assemblies. By manual inspection of the alignments between PacBio assemblies and short-read  
207 assemblies, we can validate a subset of metaMIC predictions (Fig. 5c and Fig. S14). For instance, there  
208 exist two peaks at positions of 1200bp and 6920bp in the contig of “k141\_847840” according to the  
209 anomaly scores by metaMIC, and both peaks, especially the one at 6920bp, contain higher read  
210 breakpoint counts implying possible misassembly breakpoints at these two locations. When aligning this  
211 contig against the long-read assemblies, we found that two regions in this contig (1201-6738bp and 6920-  
212 8700bp) were indeed aligned to two different long-read assembled contigs, and a change-point in the  
213 read coverage at 6920bp can be observed (see Fig. 5c), indicating that there are actually two contigs

214 wrongly assembled into one contig at position of 6920bp. We also found that only a few reads can be  
215 aligned to the region of 0-1200bp, suggesting this region may be extended mistakenly by the assembler.

216

## 217 **Application of metaMIC to isolate genomes**

218 Since metaMIC can identify and correct intra-species misassemblies such as inversions and relocations,  
219 metaMIC can also be applied to isolate genomes. We tested metaMIC on four real datasets from GAGE-  
220 B project [24], which aimed to evaluate assembly algorithms on isolate genomes. We tested metaMIC  
221 on *B. cereus*, *M. abscessus*, *R. sphaeroides* and *V. cholerae*, where the raw reads, assembled contigs [25]  
222 and curated reference genomes are available for these four species. metaMIC was ran on the assemblies  
223 downloaded from GAGE-B project and its performance was evaluated with the results by QUASt [9] as  
224 gold standard. These four datasets contain mainly relocations but a few translocations (Table S4). We  
225 noticed that similar to metagenomes, the error regions in isolate genomes also have higher anomaly  
226 scores and more read breakpoints than error-free regions (Fig. S15). We then compared metaMIC against  
227 MEC [26], a recently-developed misassembly correction tool, when identifying misassembly breakpoints  
228 on the four isolate genomes. As shown in Table 2, metaMIC identified more true misassemblies than  
229 MEC, where approximately 80% misassemblies can be corrected compared to ~30% of MEC; and after  
230 the correction by metaMIC, the total number of bases of uncorrected misassembled contigs (i.e.  
231 misassembled contig length in Table 2) was significantly reduced compared with that by MEC.

232 To further see influence of misassembly correction on isolate genomes, we scaffolded original and  
233 corrected contigs separately with popular scaffolders including BESST [27] and ScaffMatch [28], and  
234 then used QUASt to evaluate the scaffolding results. As seen in Table 3 and supplementary Table 6, the

235 number of misassemblies in the scaffolding results based on metaMIC's corrected contigs was much  
236 lower than that based on the original uncorrected contigs, and metaMIC significantly outperforms MEC  
237 in terms of misassembled contig length. Moreover, metaMIC performs comparably well or better  
238 compared against MEC in terms of NA50 and total aligned length, and performs better especially for  
239 *R.sphaeroides*. The above results clearly show the effectiveness of metaMIC when identifying and  
240 correcting misassembled contigs on isolate genomes, and also the capability of maintaining or improving  
241 the contiguity of downstream scaffolding after correction.

242

## 243 **Discussion**

244 We present a novel tool named metaMIC to identify and correct misassembled contigs from *de novo*  
245 metagenomic assemblies and demonstrate its effectiveness on both simulated and real metagenomic  
246 datasets of varying complexity. Unlike most existing metagenomic assembly evaluation methods that  
247 only evaluate individual contigs or overall assemblies, metaMIC is capable of localizing the misassembly  
248 breakpoints and then corrects the misassembled contigs at breakpoints. By integrating various types of  
249 features extracted from both reads and assemblies, including read coverage, mate pair consistency,  
250 nucleotide variants and *k*-mer abundance consistency, metaMIC is able to detect intra- and inter-species  
251 misassemblies. Additionally, metaMIC can also be applied on isolate genomes given its ability in  
252 identifying intra-species misassemblies. After the correction of misassemblies, metaMIC can  
253 significantly help improve the performance of downstream analysis including binning and scaffolding.

254 In this study, the performance of metaMIC is mainly shown on the metagenomic assemblies  
255 assembled by MEGAHIT due to its high memory efficiency [29]. As different assemblers tend to be

256 biased to certain types of misassemblies, the models trained on the outputs of one assembler may not  
257 transfer well to other assemblers. Note that metaMIC can be easily extended to work on the metagenomic  
258 assemblies by other assembler tools if the training datasets generated by the corresponding assemblers  
259 are available. We suggest to use metaMIC on the datasets from the same assembler as the one it is trained  
260 on.

261 metaMIC scans each contig with a sliding window of 100bp to localize the candidate error regions.  
262 Generally, a shorter window size can have a higher resolution to pinpoint error regions but require more  
263 computation resources while the longer window size can be robust to noise but are more likely to cover  
264 multiple errors. In addition, metaMIC currently cannot distinguish the types of assembly errors. In the  
265 future, more work is needed to determine the error types which in turn can help to correct misassemblies  
266 more accurately.

267 metaMIC correction mainly relies on splitting contigs at misassembly breakpoints. However,  
268 caution should be needed here as more fragmented sequences will be generated and mistakenly splitting  
269 may result in disrupted gene structure, which can have adverse influence on downstream functional  
270 genomic analysis. Although we have showed that metaMIC correction can improve the downstream  
271 binning results, the quality of reconstructed draft bins can be further improved if the broken contigs can  
272 be joined into scaffolds correctly. Thus, the combination of metaMIC and scaffolding algorithms will be  
273 a promising direction for future research, leading to effective approaches for reconstructing genomes  
274 from sequencing data with higher quality and completeness.

275 Several directions hold promise for further improvements to metaMIC. Firstly, metagenomic read  
276 mapping can be evaluated in more robust manner by aligning multi-assigned reads in a probabilistic

277 manner to their contig of origin [30] or using base-level quality metrics such as CIGAR strings [31].  
278 Secondly, increasing the amount of training data and integrating other assemblers such as metaSPAdes  
279 [32] are also potential directions for the improvement of metaMIC. Thirdly, the factors that may result  
280 in false positive predictions, such as structural variation within species of high similarity and G-C bias  
281 in sequencing coverage could be taken into account in future work. Finally, as reference genomes of  
282 many bacterium are available, a better performance can be achieved by the combination of reference-  
283 free and reference-based approaches.

284

## 285 **Conclusions**

286 Here, a novel tool named metaMIC is developed for identifying and correcting misassemblies in *de novo*  
287 metagenomic assemblies without the use of reference genomes. Benchmarking on both simulated and  
288 real datasets, we show that metaMIC is able to pinpoint misassemblies in both single and metagenomic  
289 assemblies. We also demonstrate that metaMIC is able to improve the scaffolding or binning results by  
290 splitting misassembled contigs at misassembly breakpoints. As none of current assemblers can achieve  
291 a completely accurate assembly and misassemblies in contigs have negative influence on downstream  
292 analysis, we expect metaMIC can serve as a guide in optimizing metagenomic assemblies and help  
293 researchers be aware of problematic regions in assembled contigs, so as to avoid misleading downstream  
294 biological analysis.

295

## 296 **Methods**

### 297 **metaMIC workflow**

298 metaMIC is implemented in Python3 (Python  $\geq 3.6$ ). It requires assembled contigs in FASTA format  
299 and paired-end reads in FASTA or FASTQ format as input. Alternatively, the user can provide a BAM  
300 file with read pairs mapping to contigs. Given the contigs, metaMIC will first identify the misassemblies  
301 by employing a random forest classifier trained on the features extracted from reads and contigs. Next,  
302 metaMIC will identify the regions containing misassembly breakpoints in the misassembled contigs  
303 based on the anomaly scores, and then recognize the exact positions of the breakpoints in the error regions.  
304 Then metaMIC will correct the misassemblies by splitting the contigs at the breakpoints. The details will  
305 be given below.

306

### 307 *Features extracted from reads and contigs*

308 BWA-MEM (v.0.7.17) [33] is used to map paired-end reads to assemblies, followed by using samtools  
309 (v1.9) [34] to filter low quality mappings and sorting the alignments. Then four types of features will be  
310 extracted from the sorted BAM file, including read coverage, mate-pair consistency, nucleotide variants  
311 and  $k$ -mer abundance difference.

312 For each paired-end reads with left and right mate reads, the insert size corresponding to the distance  
313 between two mates is assumed to follow normal distribution [26]. A read is regarded as a proper read if  
314 the insert size belongs to  $[\mu - 3\sigma, \mu + 3\sigma]$  and the orientation is consistent with its mate, and is a  
315 discordant read otherwise. A read is regarded as a clipped read if it contains at least 20 unaligned bases  
316 at either end of the read, and a read is regarded as a supplementary read if different parts of the read are  
317 aligned to different regions of contigs.

318       The coverage-based features include standardized read coverage, fragment coverage and their  
319 deviation. The read coverage per base represents the number of reads that are mapped over that base, and  
320 the fragment coverage is the number of proper paired-end reads spanning that base. The read coverage  
321 and fragment coverage are further standardized as the ones divided by the means of the corresponding  
322 coverages of all bases across the contig or a given region.

323       The nucleotide variants information is extracted from BAM file with the help of samtools. metaMIC  
324 counts the number of discordant, ambiguous and correct alignments separately at each position. For each  
325 type of alignment in a contig, metaMIC will calculate the proportion of the alignment by dividing the  
326 number of this type of alignments to the total number of mapped bases across the contig, and the same  
327 for a given region.

328       metaMIC calculates the  $k$ -mer abundance difference (KAD) at each base based on the alignment of  
329 paired-end reads to contigs. The KAD value, proposed by He et al [16], measures the consistency  
330 between the abundance of a  $k$ -mer from short reads and the occurrence of the  $k$ -mer in the genome. A  $k$ -  
331 mer with KAD value not belonging to  $[-0.5, +0.5]$  will be regarded as an error  $k$ -mer, and a base is  
332 regarded as an error base if an error  $k$ -mer covers that base. For a given contig, metaMIC will count the  
333 number of error bases across the contig and divide it by the contig length. The proportion of error bases  
334 within a given region from a contig will be calculated in the same way.

335       In summary, the above these four types of features will be extracted for the whole contig (contig-  
336 based features) or a window of 100bp (window-based features). The contig-based features will be used  
337 to train a random forest to identify misassembled contigs, while the window-based features will be used  
338 as input of isolate forests to recognize the error regions containing breakpoints.



339 *Identification of misassembled contigs*

340 With the above contig-based features, metaMIC trains a random forest [35] implemented in Scikit-Learn  
341 [36] to discriminate misassembled contigs from those correctly assembled ones, where an ensemble of  
342 1,000 trees are used. For each contig, a probability score representing the likelihood that the contig is  
343 misassembled will be output by metaMIC. The random forest model was trained on a training dataset  
344 containing contigs assembled from simulated bacterial metagenomes, whereas the ground truth  
345 misassembly labels of contigs provided MetaQUAST are used as a target for training the model. Due to  
346 the existence of strong class imbalance, we down-sampled the training dataset to obtain the same number  
347 of correct contigs paired with the misassembled contigs.

348

349 *Localizing breakpoints in misassembled contigs*

350 After identifying misassembled contigs, metaMIC is able to localize the misassembly breakpoints in  
351 those misassembled contigs. Firstly, metaMIC scans each contig with a sliding window of 100bp, and  
352 calculates an anomaly score for each window by employing isolation forest [37] based on window-based  
353 features to localize the error regions containing misassembly breakpoints, where the region with a higher  
354 anomaly score may be an error region; Secondly, metaMIC uses the read breakpoint ratio to recognize  
355 the exact misassembly breakpoint in an error region. Specifically, for a given predicted misassembled  
356 contig, metaMIC identifies a 100bp region with the highest anomaly score as an error region and then  
357 the position with the highest read breakpoint ratio within this window as the misassembly breakpoint. For  
358 those error regions without read breakpoints, the central position of the error region is regarded as the  
359 misassembly breakpoint.

## 360 **Evaluation of binning results**

361 When evaluating a set of bins reconstructed from simulated microbial datasets, we use BLASTn to map  
362 each bin against the ground truth genomes used for each dataset. A representative genome of each bin is  
363 determined based on the genome which can be covered by the highest fraction of nucleotides from that  
364 bin. Then for each bin, we define the number of nucleotides in the bin that belong to the representative  
365 genome as true positives (TP). The total number of nucleotides from the bin not covered by the  
366 representative genome corresponds to the false positives (FP), and the number of nucleotides in the  
367 representative genome not covered by any contigs from that bin represents the false negatives (FN). Then  
368 the completeness, contamination and F1 score of each bin can be calculated as follows.

$$369 \quad \text{completeness} = \frac{TP}{TP + FN}$$

$$370 \quad \text{purity} = \frac{TP}{TP + FP}$$

$$371 \quad \text{contamination} = 1 - \text{purity}$$

$$372 \quad \text{F1 score} = \frac{2 * \text{completeness} * \text{purity}}{\text{completeness} + \text{purity}}$$

373 For the real metagenomics data sets where the ground truth genomes are inaccessible, we employ  
374 CheckM [38] to estimate the completeness and contamination of each bin.

375

## 376 **Abbreviations**

377 **MAG:** metagenome-assembled genomes

378 **bp:** base pair

379 **AUPRC:** area under the precision-recall curve

380 **KAD:** *k*-mer abundance difference

## 381 **References**

- 382 1. Salzberg SL, Phillippy AM, Zimin A, Puiu D, Magoc T, Koren S, Treangen TJ, Schatz MC,  
383 Delcher AL, Roberts M, et al: **GAGE: A critical evaluation of genome assemblies and**  
384 **assembly algorithms.** *Genome Res* 2012, **22**:557-567.
- 385 2. Sczyrba A, Hofmann P, Belmann P, Koslicki D, Janssen S, Droge J, Gregor I, Majda S, Fiedler  
386 J, Dahms E, et al: **Critical Assessment of Metagenome Interpretation-a benchmark of**  
387 **metagenomics software.** *Nat Methods* 2017, **14**:1063-1071.
- 388 3. Bowers RM, Kyrpides NC, Stepanauskas R, Harmon-Smith M, Doud D, Reddy TBK, Schulz  
389 F, Jarett J, Rivers AR, Eloe-Fadrosh EA, et al: **Minimum information about a single**  
390 **amplified genome (MISAG) and a metagenome-assembled genome (MIMAG) of**  
391 **bacteria and archaea.** *Nat Biotechnol* 2017, **35**:725-731.
- 392 4. Shaiber A, Eren AM: **Composite Metagenome-Assembled Genomes Reduce the**  
393 **Quality of Public Genome Repositories.** *mBio* 2019, **10**.
- 394 5. Chen LX, Anantharaman K, Shaiber A, Eren AM, Banfield JF: **Accurate and complete**  
395 **genomes from metagenomes.** *Genome Res* 2020, **30**:315-333.
- 396 6. Kingsford C, Schatz MC, Pop M: **Assembly complexity of prokaryotic genomes using**  
397 **short reads.** *BMC Bioinformatics* 2010, **11**:21.
- 398 7. Nagarajan N, Pop M: **Parametric complexity of sequence assembly: theory and**  
399 **applications to next generation sequencing.** *J Comput Biol* 2009, **16**:897-908.
- 400 8. Mikheenko A, Saveliev V, Gurevich A: **MetaQUAST: evaluation of metagenome**  
401 **assemblies.** *Bioinformatics* 2016, **32**:1088-1090.
- 402 9. Gurevich A, Saveliev V, Vyahhi N, Tesler G: **QUAST: quality assessment tool for genome**  
403 **assemblies.** *Bioinformatics* 2013, **29**:1072-1075.
- 404 10. Rusch DB, Halpern AL, Sutton G, Heidelberg KB, Williamson S, Yooseph S, Wu D, Eisen JA,  
405 Hoffman JM, Remington K, et al: **The Sorcerer II Global Ocean Sampling expedition:**  
406 **northwest Atlantic through eastern tropical Pacific.** *PLoS Biol* 2007, **5**:e77.
- 407 11. Zhu X, Leung HC, Wang R, Chin FY, Yiu SM, Quan G, Li Y, Zhang R, Jiang Q, Liu B, et al:  
408 **misFinder: identify mis-assemblies in an unbiased manner using reference and**  
409 **paired-end reads.** *BMC Bioinformatics* 2015, **16**:386.
- 410 12. Clark SC, Egan R, Frazier PI, Wang Z: **ALE: a generic assembly likelihood evaluation**  
411 **framework for assessing the accuracy of genome and metagenome assemblies.**  
412 *Bioinformatics* 2013, **29**:435-443.
- 413 13. Mineeva O, Rojas-Carulla M, Ley RE, Scholkopf B, Youngblut ND: **DeepMAseD:**  
414 **evaluating the quality of metagenomic assemblies.** *Bioinformatics* 2020, **36**:3011-3017.
- 415 14. Kuhring M, Dabrowski PW, Piro VC, Nitsche A, Renard BY: **SuRankCo: supervised ranking**  
416 **of contigs in de novo assemblies.** *BMC Bioinformatics* 2015, **16**:240.
- 417 15. Olson ND, Treangen TJ, Hill CM, Cepeda-Espinoza V, Ghurye J, Koren S, Pop M:  
418 **Metagenomic assembly through the lens of validation: recent advances in assessing**  
419 **and improving the quality of genomes assembled from metagenomes.** *Brief Bioinform*  
420 2019, **20**:1140-1150.
- 421 16. He C, Lin G, Wei H, Tang H, White FF, Valent B, Liu S: **Factorial estimating assembly base**

- 422 errors using k-mer abundance difference (KAD) between short reads and genome  
423 assembled sequences. *NAR Genom Bioinform* 2020, **2**:lqaa075.
- 424 17. Pruitt KD, Tatusova T, Maglott DR: **NCBI reference sequences (RefSeq): a curated non-**  
425 **redundant sequence database of genomes, transcripts and proteins.** *Nucleic Acids*  
426 *Res* 2007, **35**:D61-65.
- 427 18. Phillippy AM, Schatz MC, Pop M: **Genome assembly forensics: finding the elusive mis-**  
428 **assembly.** *Genome Biol* 2008, **9**:R55.
- 429 19. Hunt M, Kikuchi T, Sanders M, Newbold C, Berriman M, Otto TD: **REAPR: a universal tool**  
430 **for genome assembly evaluation.** *Genome Biol* 2013, **14**:R47.
- 431 20. Pasolli E, Asnicar F, Manara S, Zolfo M, Karcher N, Armanini F, Beghini F, Manghi P, Tett  
432 A, Ghensi P, et al: **Extensive Unexplored Human Microbiome Diversity Revealed by**  
433 **Over 150,000 Genomes from Metagenomes Spanning Age, Geography, and Lifestyle.**  
434 *Cell* 2019, **176**:649-662 e620.
- 435 21. Almeida A, Mitchell AL, Boland M, Forster SC, Gloor GB, Tarkowska A, Lawley TD, Finn RD:  
436 **A new genomic blueprint of the human gut microbiota.** *Nature* 2019, **568**:499-504.
- 437 22. Miller JR, Zhou P, Mudge J, Gurtowski J, Lee H, Ramaraj T, Walenz BP, Liu J, Stupar RM,  
438 Denny R, et al: **Hybrid assembly with long and short reads improves discovery of gene**  
439 **family expansions.** *BMC Genomics* 2017, **18**:541.
- 440 23. Amarasinghe SL, Su S, Dong X, Zappia L, Ritchie ME, Gouil Q: **Opportunities and**  
441 **challenges in long-read sequencing data analysis.** *Genome Biol* 2020, **21**:30.
- 442 24. Magoc T, Pabinger S, Canzar S, Liu X, Su Q, Puiu D, Tallon LJ, Salzberg SL: **GAGE-B: an**  
443 **evaluation of genome assemblers for bacterial organisms.** *Bioinformatics* 2013,  
444 **29**:1718-1725.
- 445 25. Zerbino DR, Birney E: **Velvet: algorithms for de novo short read assembly using de**  
446 **Bruijn graphs.** *Genome Res* 2008, **18**:821-829.
- 447 26. Wu B, Li M, Liao X, Luo J, Wu F, Pan Y, Wang J: **MEC: Misassembly Error Correction in**  
448 **contigs based on distribution of paired-end reads and statistics of GC-contents.**  
449 *IEEE/ACM Trans Comput Biol Bioinform* 2018.
- 450 27. Sahlin K, Vezzi F, Nystedt B, Lundeberg J, Arvestad L: **BESST--efficient scaffolding of**  
451 **large fragmented assemblies.** *BMC Bioinformatics* 2014, **15**:281.
- 452 28. Mandric I, Zelikovsky A: **ScaffMatch: scaffolding algorithm based on maximum weight**  
453 **matching.** *Bioinformatics* 2015, **31**:2632-2638.
- 454 29. van der Walt AJ, van Goethem MW, Ramond JB, Makhalyane TP, Reva O, Cowan DA:  
455 **Assembling metagenomes, one community at a time.** *BMC Genomics* 2017, **18**:521.
- 456 30. Smith-Unna R, Boursnell C, Patro R, Hibberd JM, Kelly S: **TransRate: reference-free**  
457 **quality assessment of de novo transcriptome assemblies.** *Genome Res* 2016, **26**:1134-  
458 1144.
- 459 31. Reppell M, Novembre J: **Using pseudoalignment and base quality to accurately**  
460 **quantify microbial community composition.** *PLoS Comput Biol* 2018, **14**:e1006096.
- 461 32. Nurk S, Meleshko D, Korobeynikov A, Pevzner PA: **metaSPAdes: a new versatile**  
462 **metagenomic assembler.** *Genome Res* 2017, **27**:824-834.
- 463 33. H L: **Aligning sequence reads, clone sequences and assembly contigs with BWA-MEM.**

- 464 preprint at <https://arxiv.org/abs/13033997?upload=1> 2013.
- 465 34. Li H, Handsaker B, Wysoker A, Fennell T, Ruan J, Homer N, Marth G, Abecasis G, Durbin  
466 R, Genome Project Data Processing S: **The Sequence Alignment/Map format and**  
467 **SAMtools**. *Bioinformatics* 2009, **25**:2078-2079.
- 468 35. Breiman L: **Random forests**. *Mach Learn* 2001, **45**:5-32.
- 469 36. Pedregosa F, Varoquaux G, Gramfort A, Michel V, Thirion B, Grisel O, Blondel M,  
470 Prettenhofer P, Weiss R, Dubourg V, et al: **Scikit-learn: Machine Learning in Python**.  
471 *Journal of Machine Learning Research* 2011, **12**:2825-2830.
- 472 37. Liu FT, Ting KM, Zhou Z-HJAToKdFD: **Isolation-based anomaly detection**. 2012, **6**:1-39.
- 473 38. Parks DH, Imelfort M, Skennerton CT, Hugenholtz P, Tyson GW: **CheckM: assessing the**  
474 **quality of microbial genomes recovered from isolates, single cells, and metagenomes**.  
475 *Genome Res* 2015, **25**:1043-1055.

476

477

478

479

480

481

482

483

484

485

486

487

488

489

490

## 491 **Figures**

492 **Fig. 1** Overall framework of metaMIC. **a** metaMIC extracts four types of features from the alignment of  
493 paired end reads to contigs: read coverage, nucleotide variants, mate pair consistency, and  $k$ -mer  
494 abundance consistency. **b** Misassembled contigs are identified by metaMIC based on the four features. **c**  
495 metaMIC first identifies the error regions containing misassembly breakpoints, and then recognizes the  
496 exact positions of breakpoints and corrects misassemblies by splitting misassembled contigs at  
497 breakpoints.

498 **Fig. 2** metaMIC outperforms ALE and DeepMASSED in identifying misassembled contigs in simulated  
499 metagenomic datasets. **a-d** The performance of the three tools on the CAMI-medium (M) and high-  
500 complexity (H) communities (**a**), *CAMI2-Skin* (**b**), *CAMI2-Gut* (**c**), and simulated virome dataset (*Sim-*  
501 *Virome*) (**d**). **e** The AUPRC scores of metaMIC on test datasets assembled by MEGAHIT or IDBA\_UD  
502 (Test assembler), where metaMIC were trained on contigs from training datasets assembled by  
503 MEGAHIT, IDBA\_UD, or jointly by MEGAHIT and IDBA\_UD (MEGAHIT+IDBA\_UD).

504 **Fig. 3** The performance of metaMIC in localizing misassembly breakpoints on CAMI datasets. **a, b** The  
505 distribution of anomaly scores (**a**) and read breakpoint ratios (**b**) of different misassembly types across  
506 contigs from CAMI1-Medium. **c** The receiver operation curves by ALE, anomaly scores and read  
507 breakpoint ratios when discriminating error regions from error-free regions in CAMI1-Medium,  
508 respectively. **d, e** The distribution of error size of misassembly breakpoints recognized by metaMIC on  
509 CAMI1-Medium (*Medium*), CAMI1-High (*High*), CAMI2-Skin (*Skin*), CAMI2-Gut (*Gut*) and CAMI2-  
510 Oral (*Oral*) (**d**), and different misassembly types in CAMI1-Medium (**e**). **f** The distribution of normalized  
511 error size of misassembly breakpoints recognized by metaMIC and ALE on CAMI1-Medium.

512 **Fig. 4** Splitting misassembled contigs at breakpoints improves the downstream binning results over *Sim-*  
513 *Virome* and *CAMII-Medium* datasets. **a** The number of high-quality bins with low contamination (<5%)  
514 of different completeness reconstructed from original and corrected contigs. **b** The distribution of F1  
515 scores for bins reconstructed based on contigs before and after correction, where only those bins whose  
516 results change before and after correction were shown for clearness.

517 **Fig. 5** The performance of metaMIC on real metagenomic datasets. **a** The number of bins of different  
518 completeness with low contamination (<5%) reconstructed from original and corrected assemblies of  
519 ‘*Ethiopian*’ (left) and ‘*Madagascar*’ (right) cohorts. **b** Comparison of F1 scores for reconstructed bins  
520 before and after correction of contigs from ‘*Ethiopian*’ (top) and ‘*Madagascar*’ (bottom) cohorts. **c** An  
521 example of a predicted misassembled contig “k141\_847840” assembled from combined rumen fluid and  
522 solid sample. The top plot shows the alignment result of Illumina short-read assembled contig  
523 “k141\_847840” and PacBio long-read assembled contigs (“contig\_982” and “contig\_158”), where two  
524 regions in the “k141\_84780” (1201-6738bp and 6920-8700bp) were aligned to “contig\_982” and  
525 “contig\_158”, respectively. The middle figure shows a snapshot of Integrative Genomics Viewer for  
526 contig “k141\_847840”. The bottom plot shows the anomaly score (blue) and read breakpoint ratio (green)  
527 across contig “k141\_847840”.

528

529

530

531

532

## 533 Tables

534 **Table 1** Performance comparison of metaMIC and MEC on four real datasets from the GAGE-B project.

| Species        | Correction tool | Misassembled contig length | FN | TP | FP |
|----------------|-----------------|----------------------------|----|----|----|
| M. abscessus   | raw             | 1,189,973                  | 20 | \  | \  |
|                | MEC             | 982,986                    | 14 | 6  | 2  |
|                | metaMIC         | 593,741                    | 6  | 14 | 2  |
| V. cholerae    | raw             | 597,777                    | 7  | \  | \  |
|                | MEC             | 597,183                    | 6  | 1  | 0  |
|                | metaMIC         | 205,644                    | 3  | 4  | 1  |
| R. sphaeroides | raw             | 135,153                    | 2  | \  | \  |
|                | MEC             | 64,489                     | 1  | 1  | 0  |
|                | metaMIC         | 0                          | 0  | 2  | 7  |
| B. cereus      | raw             | 117,830                    | 5  | \  | \  |
|                | MEC             | 56,086                     | 4  | 1  | 0  |
|                | metaMIC         | 28,068                     | 1  | 4  | 3  |

535 Misassembled contig length denotes the total number of bases in the raw misassembled contigs or the  
536 misassembled contigs that cannot be corrected by MEC or metaMIC; True positive (TP) is the number  
537 of true misassemblies identified by the error correction tool; False positive (FP) is the number of  
538 misassemblies which are actually correct but mistakenly identified as misassemblies; False negative (FN)  
539 denotes the number of true misassemblies that are not identified.

540

541

542

543

544

545

546

547



548 **Table 2** Comparison of BESST scaffolding results of contigs before and after correction.

| Species       | Correction tool | #Contigs | #Total aligned length | Total length(>=0bp) | Total length(>=1000bp) | Misassembled contig length | NA50    | #Mis |
|---------------|-----------------|----------|-----------------------|---------------------|------------------------|----------------------------|---------|------|
| M.abscessus   | raw             | 262      | 5,045,398             | 5,160,404           | 5,129,190              | 1,303,084                  | 45,957  | 27   |
|               | MEC             | 268      | 5,045,445             | 5,160,476           | 5,129,015              | 982,986                    | 40,129  | 24   |
|               | metaMIC         | 274      | 5,045,398             | 5,160,404           | 5,129,190              | 755,186                    | 47,488  | 17   |
| V.cholerae    | raw             | 201      | 3,936,390             | 3,958,533           | 3,921,645              | 597,777                    | 43,122  | 10   |
|               | MEC             | 202      | 3,935,796             | 3,958,533           | 3,921,645              | 597,183                    | 43,122  | 9    |
|               | metaMIC         | 205      | 3,936,390             | 3,958,533           | 3,921,645              | 205,644                    | 43,123  | 7    |
| R.sphaeroides | raw             | 231      | 4,492,687             | 4,519,491           | 4,486,060              | 359,217                    | 75,728  | 5    |
|               | MEC             | 230      | 4,492,749             | 4,519,550           | 4,486,119              | 168,646                    | 78,611  | 4    |
|               | metaMIC         | 232      | 4,493,107             | 4,520,061           | 4,486,630              | 51,809                     | 78,920  | 3    |
| B.cereus      | raw             | 141      | 5,310,597             | 5,381,347           | 5,369,165              | 332,560                    | 104,970 | 7    |
|               | MEC             | 140      | 5,310,816             | 5,381,940           | 5,369,758              | 332,001                    | 104,970 | 7    |
|               | metaMIC         | 140      | 5,311,395             | 5,382,650           | 5,370,789              | 175,743                    | 104,970 | 5    |

549 #Mis denotes the number of scaffolds that contain misassemblies; Total aligned length denotes the

550 length of total number of bases from contigs that can be aligned to the assembly.

551

## (a) Input features

### (1) Read coverage

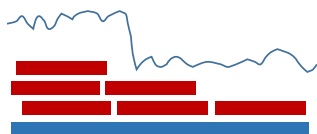

### (2) Mate pair consistency

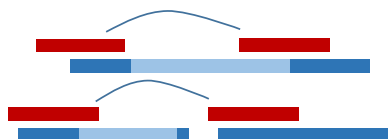

### (3) Nucleotide variants

ATCCTACACCACTAC  
ATCCTACACGACTAC

ATCCTACACCACTAC

Diagram illustrating nucleotide variants. Red and blue horizontal bars represent reads. A red vertical bar highlights a mismatch (G) in the second read. The reference sequence ATCCTACACCACTAC is shown below.

### (4) *k*-mer consistency

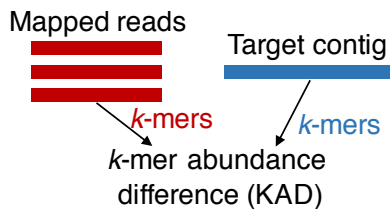

## (b) Misassembled contig identification

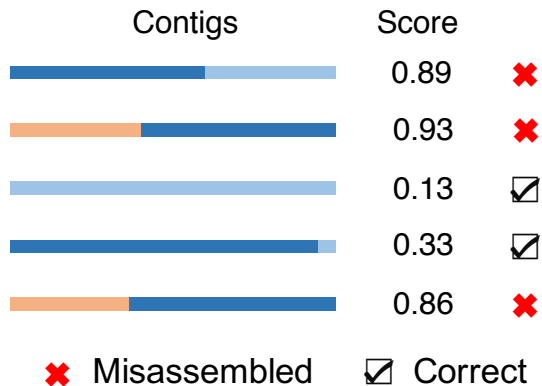

## (c) Breakpoint localization

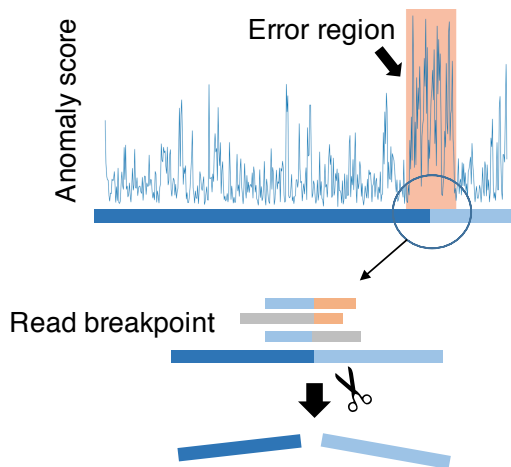

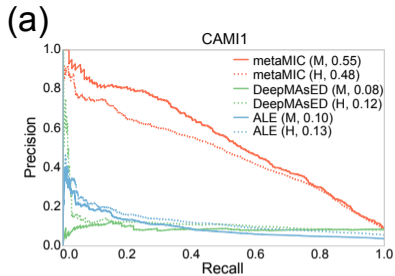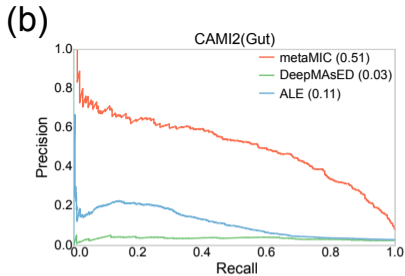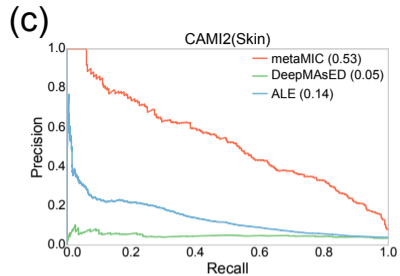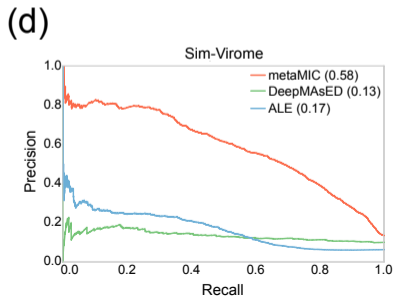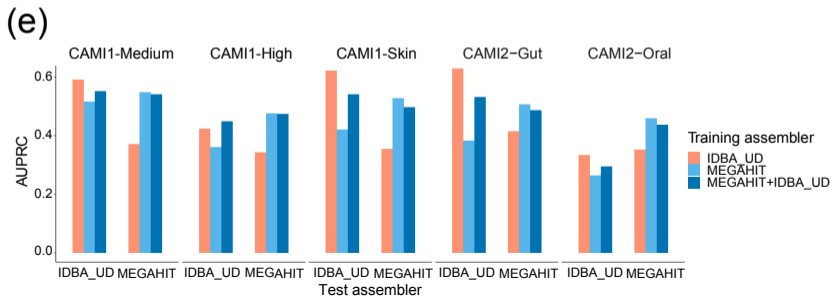

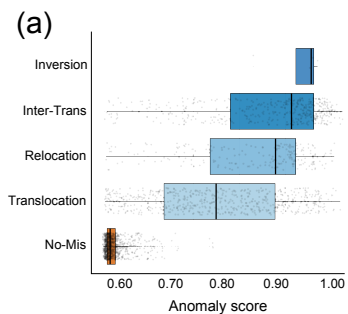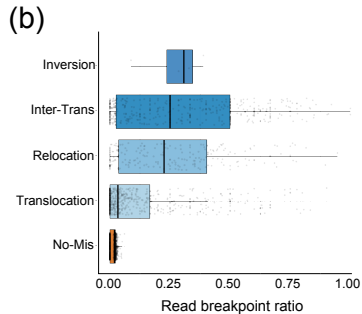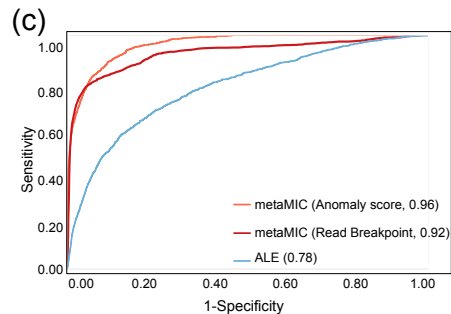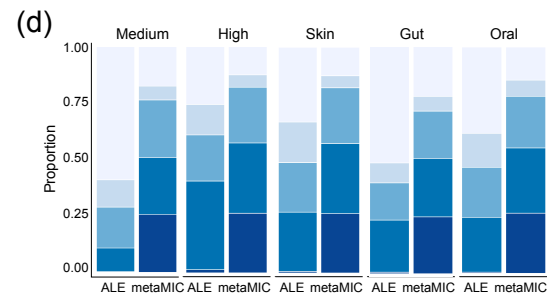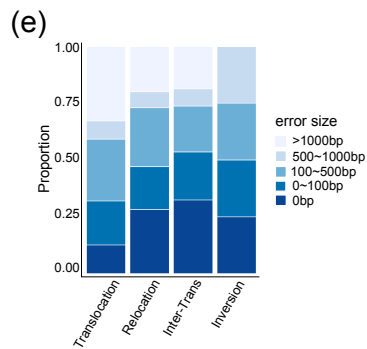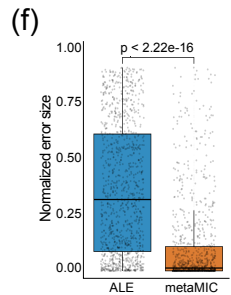

**(a)**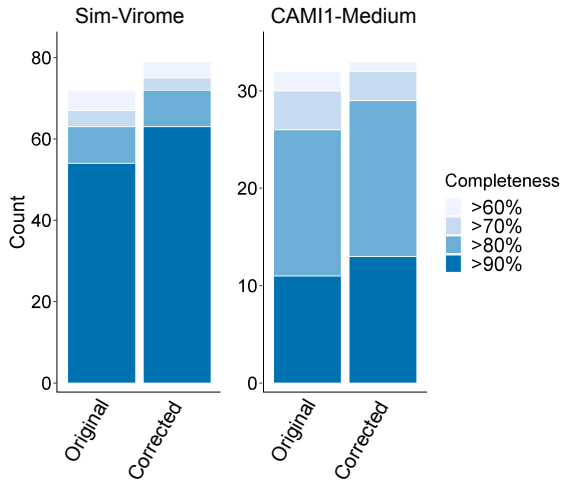**(b)**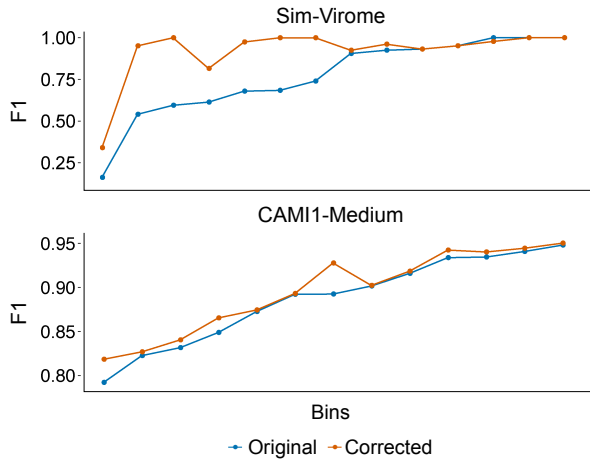

**(a)**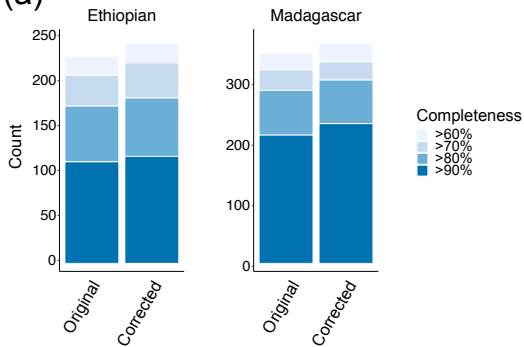**(b)**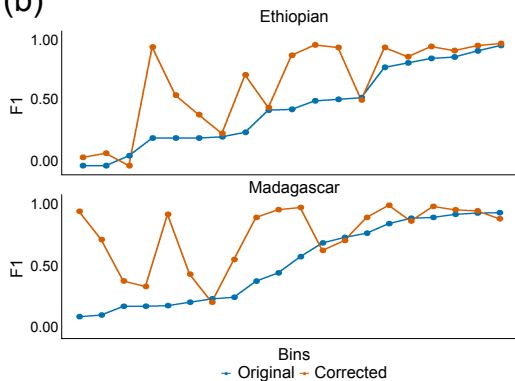**(c)**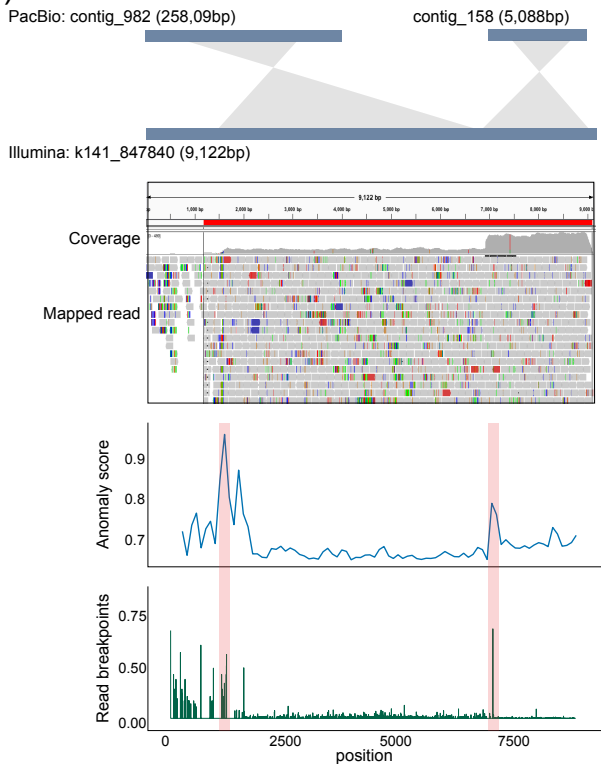

Source: http://biorxiv.org/content/10.1101/2021.06.22.449514v1.full.pdf
